# Supplementary material for: Whole genome sequencing of Neisseria gonorrhoeae in two cities of Bangladesh reveals high genomic diversity and stable antimicrobial resistance among key populations
Source: Research Square preprint supplement (doi:10.21203/rs.3.rs-7292807/v1), 2025-09-10
Supplement: Supplementary file 1 [file bba323bd423fca6f7e285482.docx]

**Additional file 1**: The assembly statistics of the *de novo* assembled 24 *N. gonorrhoeae* from Bangladesh (2014-2024) using Quast. Identification was performed using Speciator from Pathogenwatch and Kraken2.

| **Isolate ID**  **(n = 24)** | **Number of contigs** | **N50 (bp)** | **L50** | **Read Coverage** | **GC (%)** | **Pathogenwatch &**  **Kraken2 identification** | **SRA accession** | **GenBank accession** |
| --- | --- | --- | --- | --- | --- | --- | --- | --- |
| 47SF082 | 168 | 38534 | 20 | 194 | 52.3 | *N. gonorrhoeae* | SRR27726235 | JBPIXX000000000 |
| 96RF955 | 126 | 46408 | 17 | 487 | 52.6 | *N. gonorrhoeae* | SRR27726234 | JBPIXW000000000 |
| F0089 | 139 | 42015 | 14 | 220 | 52.5 | *N. gonorrhoeae* | SRR27726245 | JBPIXV000000000 |
| F0129 | 137 | 41863 | 16 | 262 | 52.6 | *N. gonorrhoeae* | SRR27726244 | JBPIXU000000000 |
| F0151 | 143 | 44149 | 17 | 136 | 52.3 | *N. gonorrhoeae* | SRR27726233 | JBPIXT000000000 |
| F0154 | 132 | 43486 | 15 | 268 | 52.4 | *N. gonorrhoeae* | SRR27726230 | JBPIXS000000000 |
| F0155 | 139 | 45569 | 16 | 180 | 52.4 | *N. gonorrhoeae* | SRR27726229 | JBPIXR000000000 |
| F0192 | 130 | 46392 | 16 | 177 | 52.4 | *N. gonorrhoeae* | SRR27726228 | JBPIXQ000000000 |
| F2027 | 143 | 42059 | 17 | 109 | 52.6 | *N. gonorrhoeae* | SRR27726232 | JBPIXP000000000 |
| F2328 | 140 | 38728 | 19 | 116 | 52.4 | *N. gonorrhoeae* | SRR31069466 | JBPIXO000000000 |
| H0401 | 149 | 44306 | 15 | 140 | 52.4 | *N. gonorrhoeae* | SRR27726227 | JBPIXN000000000 |
| H0404 | 137 | 40331 | 16 | 254 | 52.5 | *N. gonorrhoeae* | SRR27726226 | JBPIXM000000000 |
| H0440 | 145 | 39021 | 16 | 256 | 52.5 | *N. gonorrhoeae* | SRR27726225 | JBPIXL000000000 |
| H0587 | 132 | 40431 | 16 | 230 | 52.5 | *N. gonorrhoeae* | SRR27726224 | JBPIXK000000000 |
| H2090 | 144 | 46333 | 16 | 75 | 52.4 | *N. gonorrhoeae* | SRR27726231 | JBPIXJ000000000 |
| M0052 | 127 | 46443 | 13 | 160 | 52.4 | *N. gonorrhoeae* | SRR27726236 | JBPIXI000000000 |
| M0126 | 201 | 36508 | 21 | 144 | 52.4 | *N. gonorrhoeae* | SRR27726243 | JBPIXH000000000 |
| M0127 | 149 | 39876 | 17 | 242 | 52.6 | *N. gonorrhoeae* | SRR27726242 | JBPIXG000000000 |
| M0226 | 140 | 40527 | 15 | 386 | 52.4 | *N. gonorrhoeae* | SRR27726241 | JBPIXF000000000 |
| M0302 | 123 | 41191 | 15 | 199 | 52.5 | *N. gonorrhoeae* | SRR27726240 | JBPIXE000000000 |
| M0321 | 131 | 40345 | 17 | 202 | 52.4 | *N. gonorrhoeae* | SRR27726239 | JBPIXD000000000 |
| M0438 | 125 | 40489 | 17 | 181 | 52.5 | *N. gonorrhoeae* | SRR27726238 | JBPIXC000000000 |
| M0499 | 148 | 35958 | 19 | 229 | 52.4 | *N. gonorrhoeae* | SRR27726237 | JBPIXB000000000 |
| V2104 | 146 | 40529 | 16 | 130 | 52.4 | *N. gonorrhoeae* | SRR31069465 | JBPIXA000000000 |
| **Average** | **141.4** | **41729** | **17** | **207** | **52.4** | ***NA*** | **NA** | **NA** |

**Additional file 2**: Antimicrobial susceptibility testing for 24 *N. gonorrhoeae* isolates using the disk diffusion method from Bangladesh (2014-2024), interpreted according to Clinical and Laboratory Standards Institute (CLSI) guidelines.

| **Isolate Id** | **Cefepime** | **Cefixime** | **Ceftriaxone** | **Ciprofloxacin** | **Penicillin G** | **Tetracycline** | **Azithromycin** |
| --- | --- | --- | --- | --- | --- | --- | --- |
| 47SF082 | Sensitive | Sensitive | Sensitive | Intermediate | Intermediate | Resistant | Sensitive |
| 96RF955 | Sensitive | Resistant | Sensitive | Resistant | Intermediate | Resistant | Sensitive |
| F0089 | Sensitive | Sensitive | Sensitive | Resistant | Resistant | Resistant | Sensitive |
| F0129 | Sensitive | Sensitive | Sensitive | Intermediate | Intermediate | Intermediate | Sensitive |
| F0151 | Sensitive | Sensitive | Sensitive | Resistant | Resistant | Resistant | Sensitive |
| F0154 | Sensitive | Sensitive | Sensitive | Resistant | Intermediate | Sensitive | Sensitive |
| F0155 | Sensitive | Sensitive | Sensitive | Resistant | Intermediate | Intermediate | Sensitive |
| F0192 | Sensitive | Sensitive | Sensitive | Resistant | Sensitive | Sensitive | Sensitive |
| F2027 | Sensitive | Sensitive | Sensitive | Resistant | Resistant | Resistant | Sensitive |
| F2328 | Sensitive | Sensitive | Sensitive | Resistant | Resistant | Resistant | Resistant |
| H0401 | Sensitive | Sensitive | Sensitive | Resistant | Resistant | Sensitive | Sensitive |
| H0404 | Sensitive | Sensitive | Sensitive | Resistant | Intermediate | Intermediate | Sensitive |
| H0440 | Sensitive | Sensitive | Sensitive | Intermediate | Intermediate | Intermediate | Sensitive |
| H0587 | Sensitive | Sensitive | Sensitive | Resistant | Intermediate | Intermediate | Sensitive |
| H2090 | Resistant | Sensitive | Sensitive | Resistant | Resistant | Resistant | Sensitive |
| M0052 | Sensitive | Sensitive | Sensitive | Resistant | Intermediate | Intermediate | Sensitive |
| M0126 | Sensitive | Sensitive | Sensitive | Resistant | Intermediate | Resistant | Sensitive |
| M0127 | Sensitive | Sensitive | Sensitive | Resistant | Intermediate | Intermediate | Sensitive |
| M0226 | Sensitive | Sensitive | Sensitive | Intermediate | Intermediate | Resistant | Sensitive |
| M0302 | Sensitive | Sensitive | Sensitive | Resistant | Intermediate | Intermediate | Sensitive |
| M0321 | Sensitive | Sensitive | Sensitive | Resistant | Intermediate | Sensitive | Sensitive |
| M0438 | Sensitive | Sensitive | Sensitive | Resistant | Intermediate | Sensitive | Sensitive |
| M0499 | Sensitive | Sensitive | Sensitive | Resistant | Intermediate | Sensitive | Sensitive |
| V2104 | Sensitive | Resistant | Sensitive | Resistant | Resistant | Resistant | Sensitive |

**Additional file 3**: Demographic, clinical, and genotypic information for 24 *Neisseria gonorrhoeae* isolates collected from key populations and specimen types in Bangladesh between 2014 and 2024. For each isolate, the following data are shown: population group (FSW: female sex worker, MSW: male sex worker, MSM: men who have sex with men, Hijra), year and place of collection, specimen type, and genotyping results (MLST, NG-STAR, NG-MAST, and cgMLST profiles)

| **Isolate ID**  **(n – 24)** | **Demographic characteristics and specimen types** | | | | **Genotype characteristics** | | | |
| --- | --- | --- | --- | --- | --- | --- | --- | --- |
| **Population** | **Study time** | **Place** | **Specimen type** | **MLST** | **NG-STAR** | **NG-MAST** | **CgMLST** |
| 47SF082 | FSW | 2014 | Dhaka | Cervical Swab | 7822 | 2246 | 1503 | 111957 |
| 96RF955 | FSW | 2014 | Dhaka | Cervical Swab | 1599 | Novel | Novel | 111958 |
| F0089 | FSW | 2022 | Jashore | Cervical Swab | 13559 | Novel | Novel | 45027, 50208, 53754* |
| F0129 | FSW | 2022 | Jashore | Cervical Swab | 13559 | Novel | Novel | 45028, 50209, 53755, 60469* |
| F0151 | FSW | 2022 | Jashore | Cervical Swab | 8776 | Novel | 8829 | 45029 |
| F0154 | FSW | 2022 | Jashore | Cervical Swab | 7363 | 419 | Novel | 77778 |
| F0155 | FSW | 2022 | Jashore | Cervical Swab | 1579 | 90 | 1407 | 45031, 111959* |
| F0192 | FSW | 2022 | Jashore | Cervical Swab | 8137 | Novel | Novel | 45032, 111960* |
| F2027 | FSW | 2023 | Jashore | Cervical Swab | 13559 | Novel | Novel | 111961 |
| F2328 | FSW | 2024 | Jashore | Cervical Swab | 7363 | 158 | 8115 | 111962 |
| H0401 | Hijra | 2022 | Dhaka | Anorectal swab | 8776 | Novel | Novel | 45033, 50211* |
| H0404 | Hijra | 2022 | Dhaka | Anorectal swab | 7363 | 158 | Novel | 77779 |
| H0440 | Hijra | 2022 | Dhaka | Anorectal swab | 7363 | 158 | Novel | 77780, 81217* |
| H0587 | Hijra | 2022 | Dhaka | Anorectal swab | 7363 | 3155 | Novel | 77781 |
| H2090 | Hijra | 2023 | Dhaka | Anorectal swab | 1579 | 90 | 1407 | 111963 |
| M0052 | MSW | 2022 | Dhaka | Oropharyngeal swab | 7363 | 158 | 15647 | 80004 |
| M0126 | MSW | 2022 | Dhaka | Anorectal swab | 7363 | 2537 | multiple | 45037, 50214, 53758, 77782* |
| M0127 | MSW | 2022 | Dhaka | Anorectal swab | 7356 | 5692 | Novel | 45038, 50215* |
| M0226 | MSW | 2022 | Dhaka | Anorectal swab | 7363 | 158 | 15647 | 80003 |
| M0302 | MSW | 2022 | Dhaka | Anorectal swab | 7363 | 3155 | Novel | 77784 |
| M0321 | MSW | 2022 | Dhaka | Anorectal swab | 7363 | 3155 | Novel | 77785, 81218* |
| M0438 | MSW | 2022 | Dhaka | Anorectal swab | 7363 | 158 | 8115 | 77786 |
| M0499 | MSW | 2022 | Dhaka | Anorectal swab | 17904 | Novel | Novel | 45043, 50219, 60476, 77787* |
| V2104 | MSW, MSM | 2024 | Dhaka | Anorectal swab | 7363 | 158 | 8115 | 111964 |

*** Mixed type cgMLST**

**Additional file 4**: The presence and frequency of key virulence factor genes among 24 *N. gonorrhoeae* isolates from Bangladesh (2014-2024), as determined by genome screening with ABRicate against the VFDB database. Genes are grouped by functional categories.

| **Virulence factors** | **Related genes** | **Frequency (n = 24)** |
| --- | --- | --- |
| Adherence | *app, lst, kdtA/waaA, lgtA, lgtC. lgtE, lgtF, lgtG, rfaC, rfaF, rfaK, lptA,pilD, pilE, pilF,pilG, pilH, pilI, pilJ, pilK, pilM,pilN, pilO, pilP, pilQ, pilT2, pilT, pilU, pilV, pilW, pilX, pilZ,* | 24 |
| *lgtB* | 23 |
| *lgtD* | 22 |
| *pilS* | 23 |
| *pilC* | 15 |
| Fatty Acid Resistance | *farA, farB* | 24 |
| Efflux Pump | *mtrC, mtrD, mtrE* | 24 |
| Immune modulator | *fHbp, nspA* | 24 |
